# Supplementary figures and images for: Dynamic human retinal pigment epithelium (RPE) and choroid architecture based on single-cell transcriptomic landscape analysis
Source: PubMed Central journal article supplement — Genes Dis. 2022 Dec 15;10(6):2540–56. doi: 10.1016/j.gendis.2022.11.007 (PMC10404887; doi:10.1016/j.gendis.2022.11.007), 2022-12-15

# Genomic Region

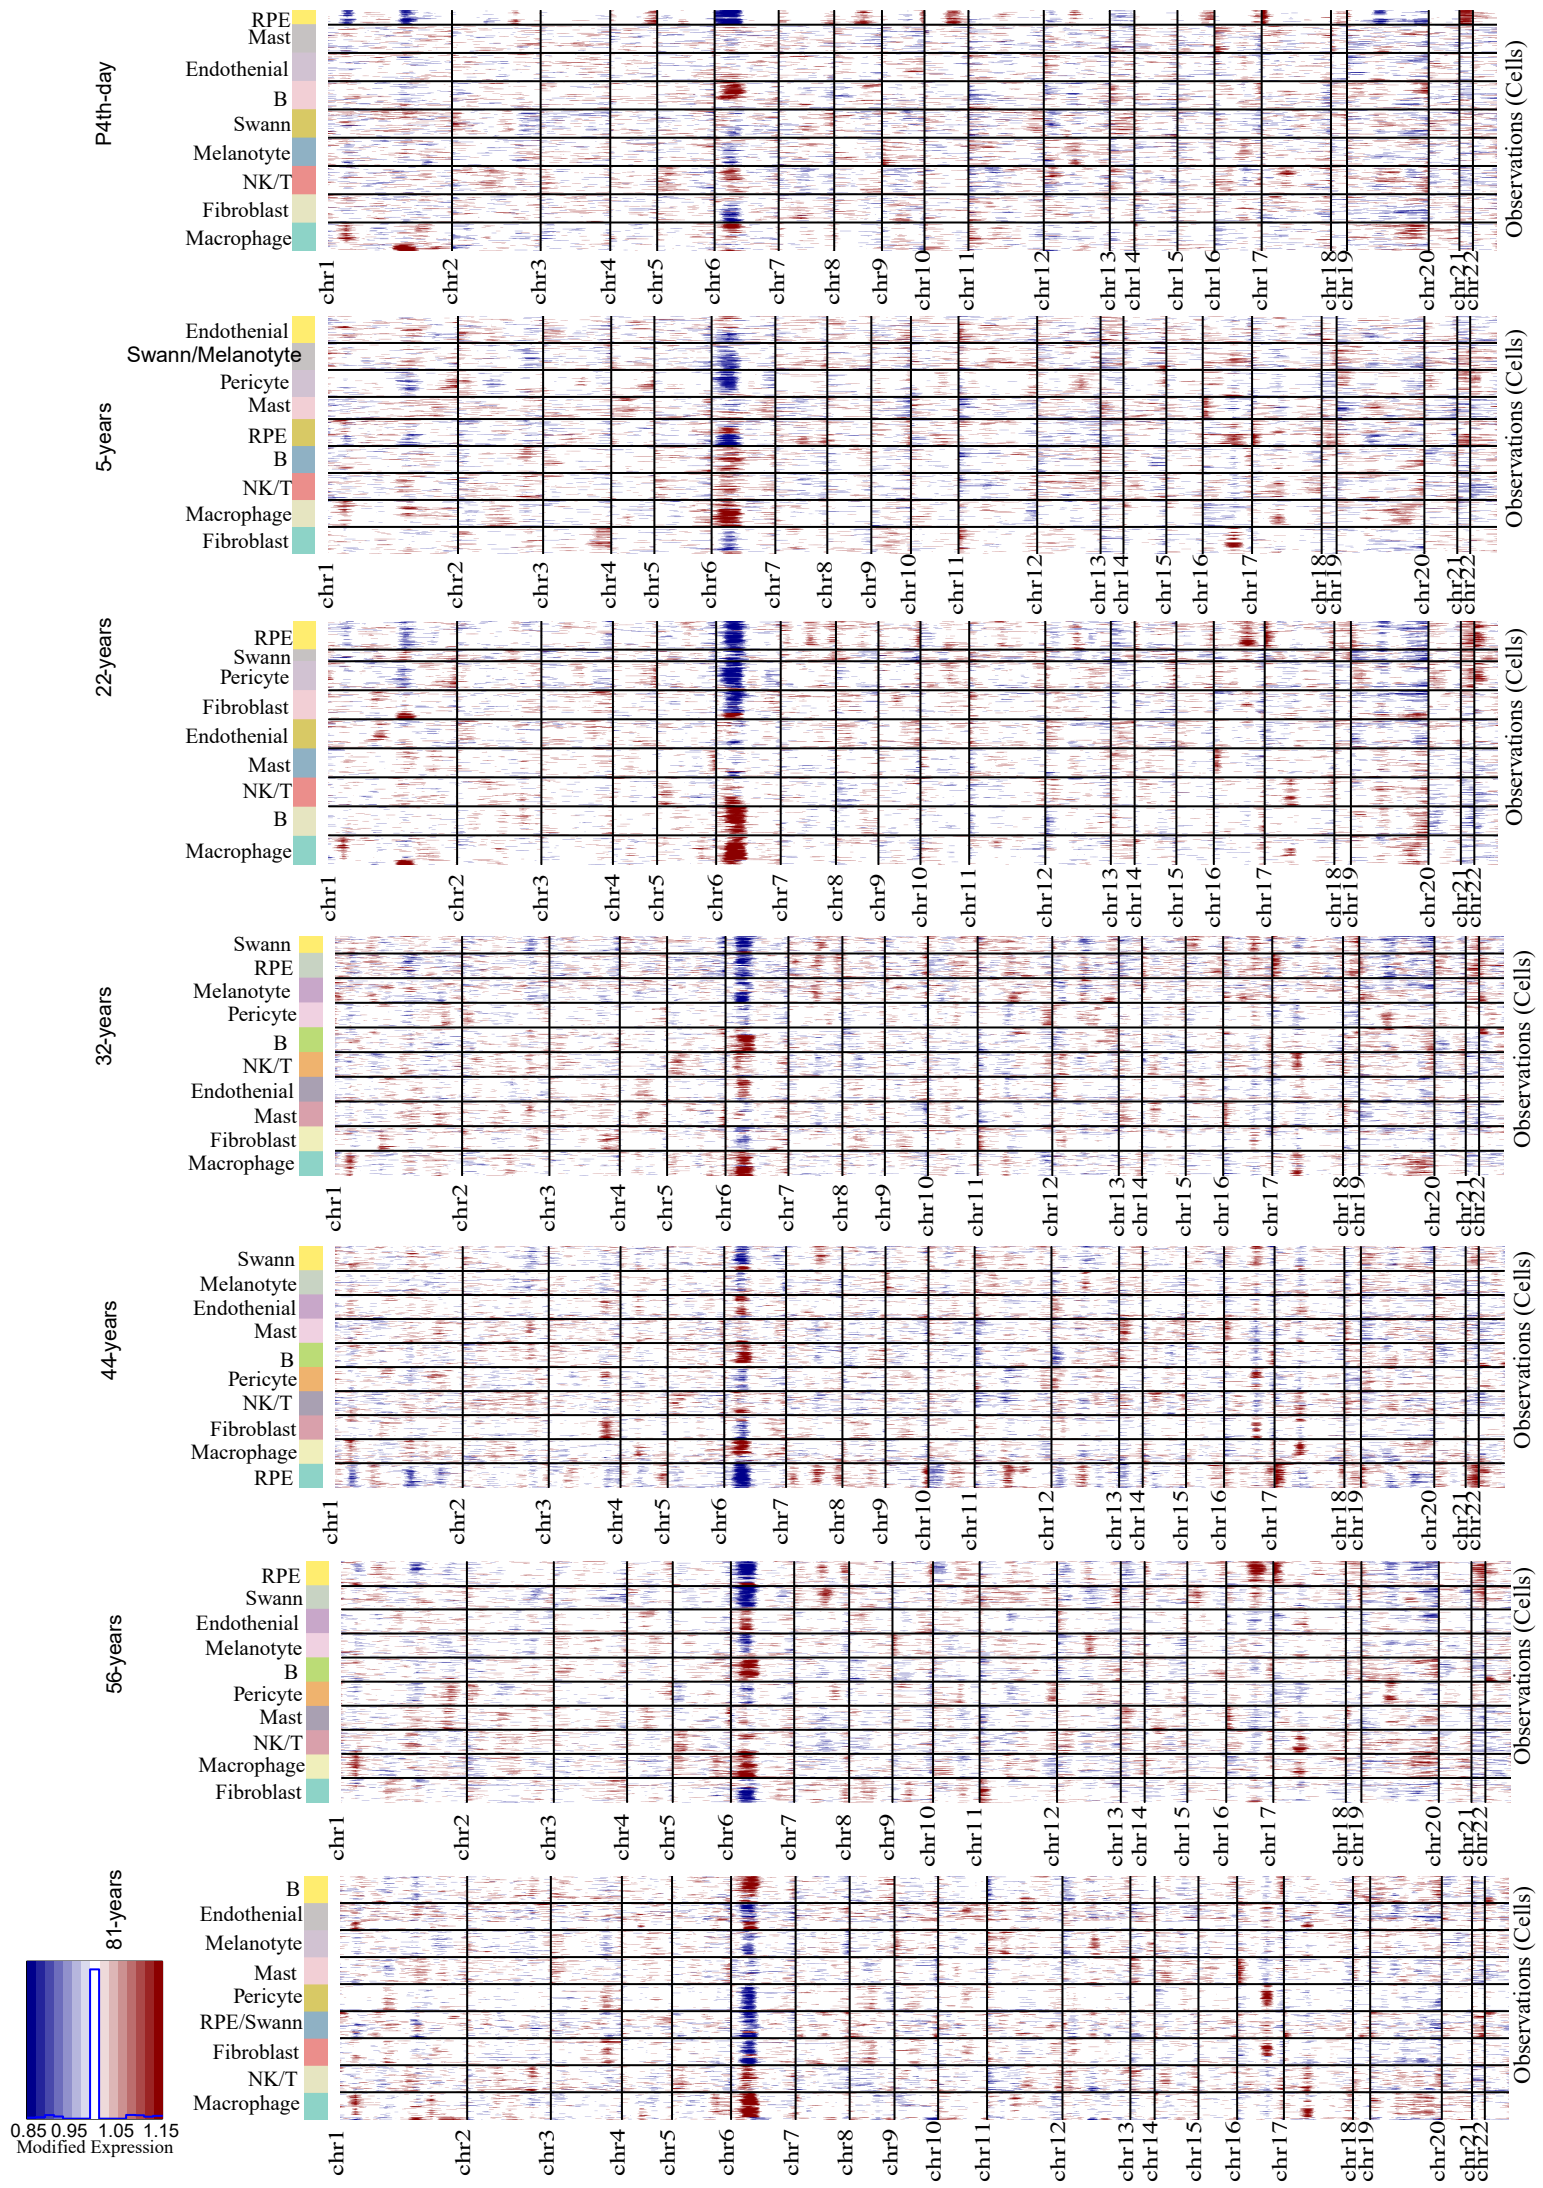

0.85 0.95 1.05 1.15  
Modified Expression

Supplement: mmc1.pdf [file mmc1.pdf]

**A****Positive correlation**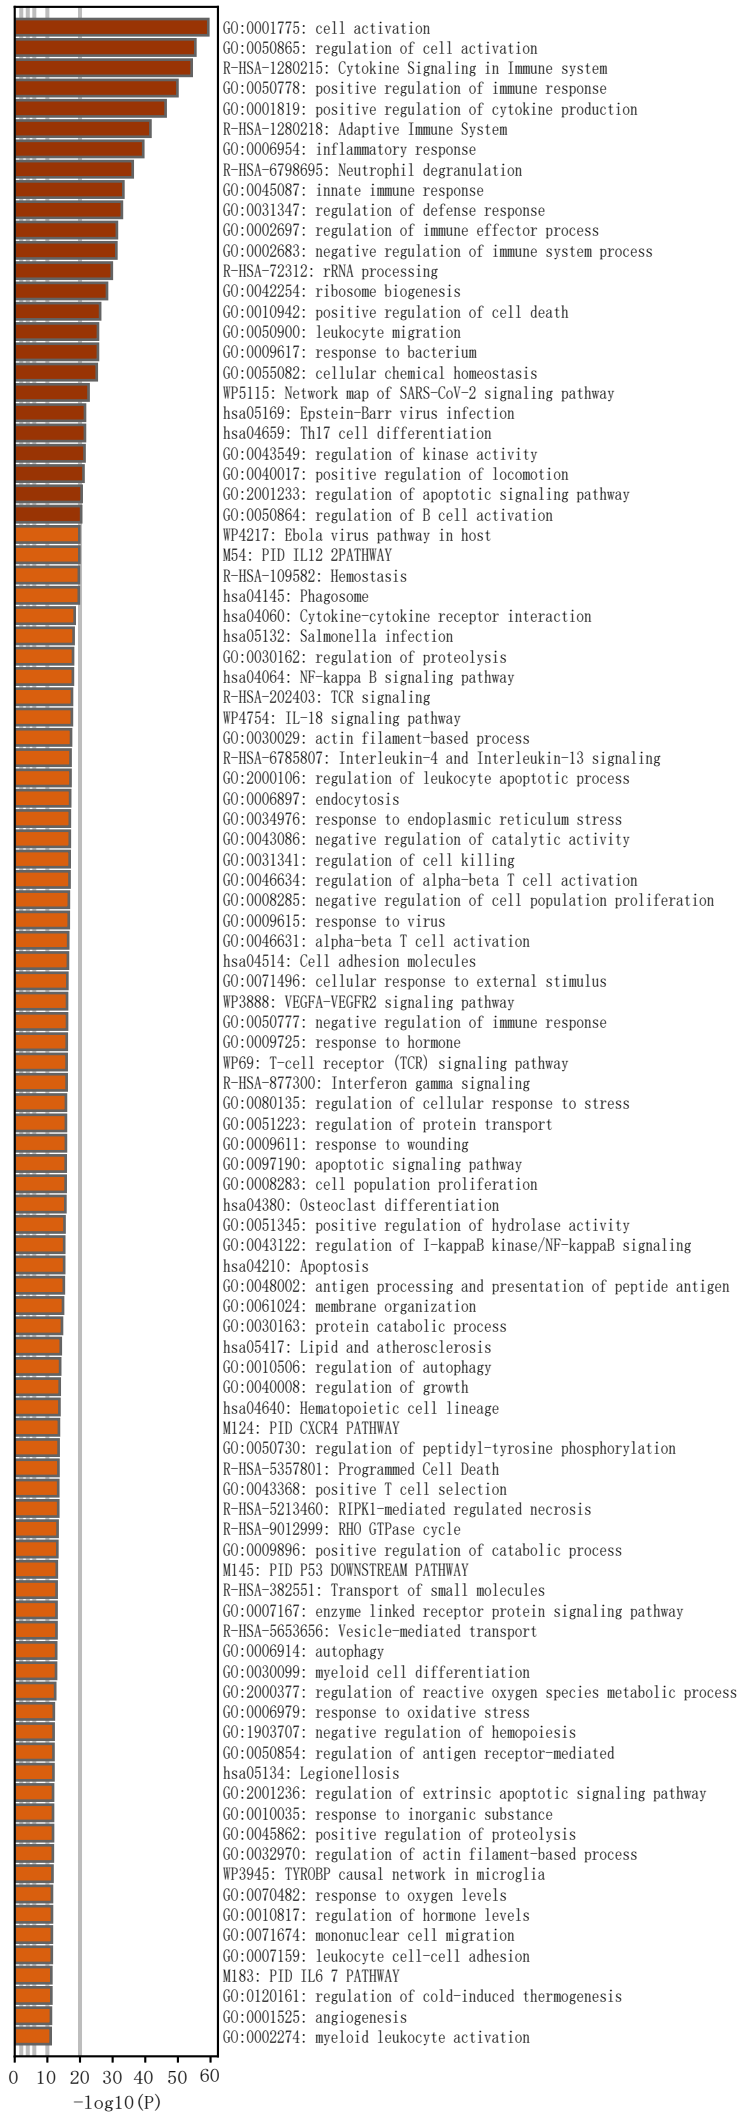**B****Negative correlation**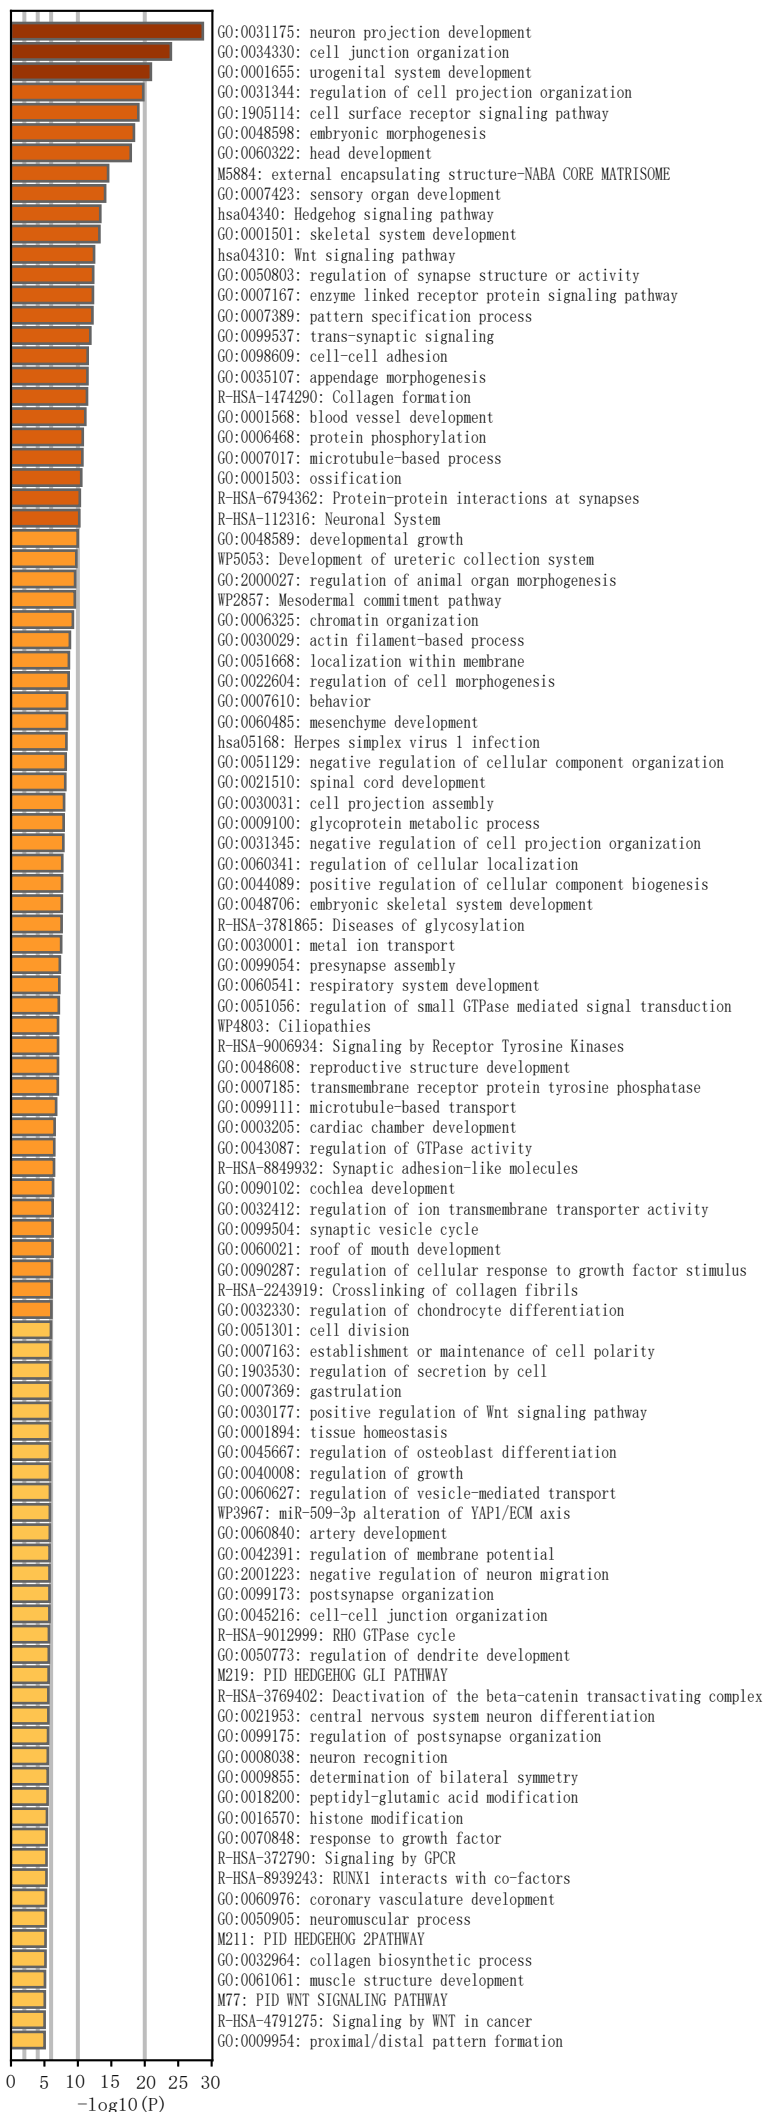

Supplement: mmc2.pdf [file mmc2.pdf]
